# Supplementary material
Source: PubMed Central journal article supplement (PMC8557287)
Supplement: bcr-2021-246579supp001.pdf [file bcr-2021-246579supp001.pdf]

**Supplementary Online Table 1: Laboratory investigations**

| <b>Laboratory Parameter</b>       | <b>Day 2</b> | <b>Day 4</b> | <b>Day 6</b> | <b>Day 7</b> | <b>Day 16</b> | <b>6 weeks</b> | <b>Reference Range</b>    |
|-----------------------------------|--------------|--------------|--------------|--------------|---------------|----------------|---------------------------|
| Haemoglobin                       | 20.8         | 16.8         | 16.7         | 15.2         | 16.6          |                | 14-22 g/dl                |
| Total leukocyte count             | 23940        | 2390         | 9490         | 11550        | 17400         | 11860          | 4000-11000 / $\mu$ l      |
| Total lymphocyte count            | 4550         | 920          | 5100         | 6100         | 9730          | 7250           | 1500-4000 / $\mu$ l       |
| Neutrophil: Lymphocyte ratio      | 3.2          | 1            | 0.32         | 0.46         | 0.6           | 0.4            |                           |
| Platelet count                    | 339,000      | 205,000      | 311,000      | 312,000      | 588,000       | 604,000        | 150,000-450,000 / $\mu$ l |
| Serum C-reactive protein (CRP)    | 2.1          | 13.7         |              | 5.24         | 1.12          | < 0.5          | 0-6 mg/L                  |
| Serum procalcitonin               | 10.76        |              | 1.4          |              |               |                | <0.5 ng/ml                |
| Serum ferritin                    | 156.4        | 115          |              | 564          | 1440          | 168            | 10-200 ng/ml              |
| Serum lactate dehydrogenase (LDH) | 764          |              |              |              | 402           |                | 10-25 units/L             |

|                                                        |      |     |      |     |       |      |               |
|--------------------------------------------------------|------|-----|------|-----|-------|------|---------------|
| N-terminal-pro-B-type natriuretic peptide (NT-Pro BNP) | 4297 |     |      |     | 421.9 | 79.2 | < 125 pg/ml   |
| Prothrombin time (PT)                                  |      |     | 17   |     | 17.6  |      | 10-14 secs    |
| International normalised ratio (INR)                   |      |     | 1.32 |     | 1.37  |      |               |
| Activated partial thromboplastin time (aPTT)           |      |     | 80.8 |     | 82    | 41.6 | 24-40 secs    |
| D-dimer                                                | 1331 |     | 5960 |     | 440   |      | 0-500 ng/ml   |
| Serum creatinine                                       | 0.7  |     | 0.1  |     |       |      | 0.1-0.7 mg/dl |
| Serum sodium                                           | 138  | 133 | 135  | 134 |       |      | 136-145 meq/L |
| Serum potassium                                        | 3.8  | 3.6 | 4.9  | 5.3 |       |      | 3.5-5.5 meq/L |
| Aspartate aminotransferase (AST)                       | 46   |     | 78   |     |       |      | 0-40 units/L  |
| Alanine aminotransferase (ALT)                         | 13   |     | 42   |     |       |      | 0-40 units/L  |
